# Supplementary material for: Screening of β-hairpin peptide-engrafted 1,2,3-triazoles to identify APEH enzyme inhibitors
Source: Royal Society of Chemistry journal article supplement (doi:10.1039/c4ra13505a), 2015-01-01
Supplement: c4ra13505a1.pdf [file c4ra13505a1.pdf]

## Screening of $\beta$ -hairpin peptide-grafted 1,2,3-triazoles to identify APEH enzyme inhibitors

A. Sandomenico, V. Celentano, L. D. D'Andrea, G. Palmieri, M. Ruvo,

### Contents

Figure S1: Molecular structure of the NHB scaffold and unnatural amino acids used.

Figure S2: General formulas for NHB peptidomimetic #1 - #12.

Figure S3: Molecular structures of NHB peptidomimetic #13 - #20.

Table S1: Analytical characterization of NHB linear and cyclized peptidomimetics.

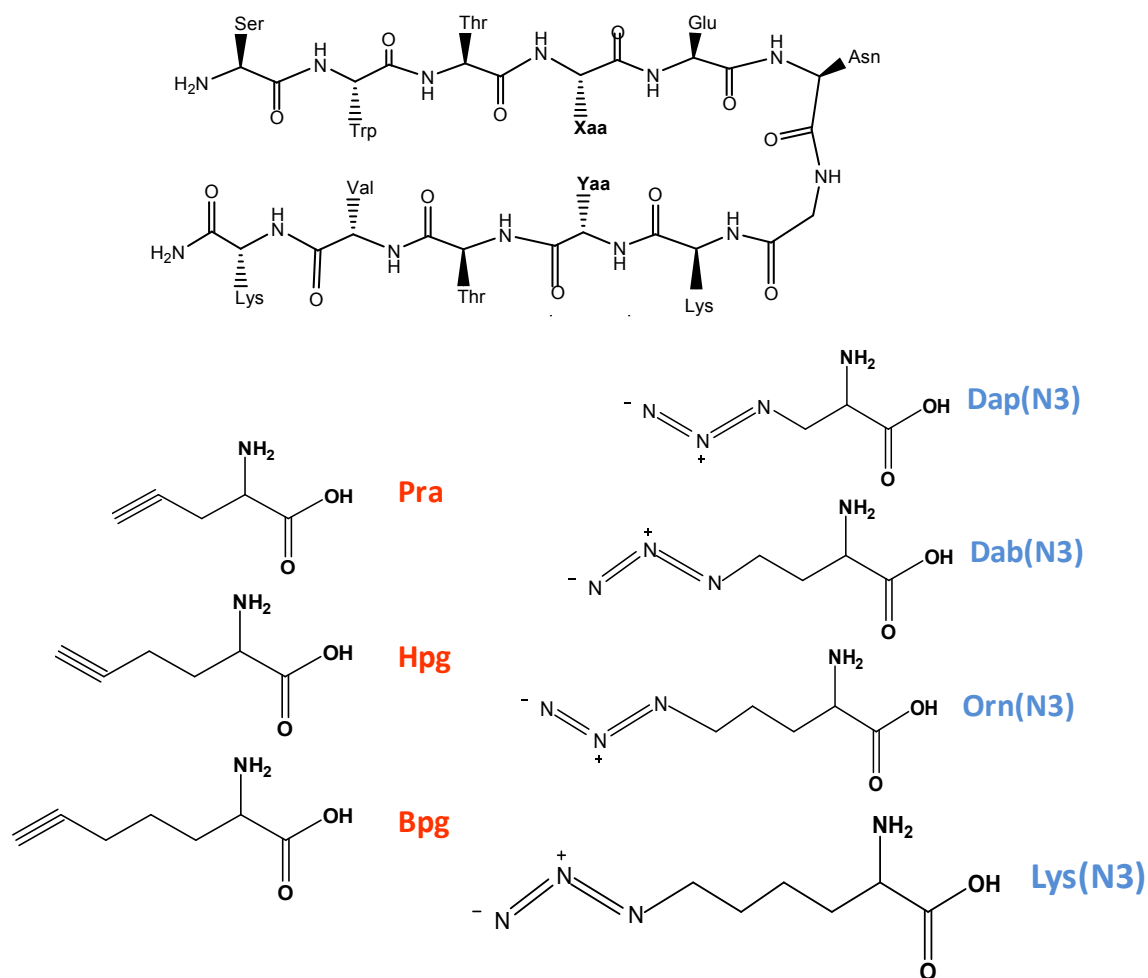

**Figure S1:** Molecular structure of the NHB scaffold and unnatural amino acids used. Top: Backbone of the NHB scaffold with the indication of the identity of the residue. Residues involved in a the click reaction (**Xaa** and **Yaa**) are in highlighted bold. Bottom: Molecular structure of the **Xaa** and **Yaa** amino acids.

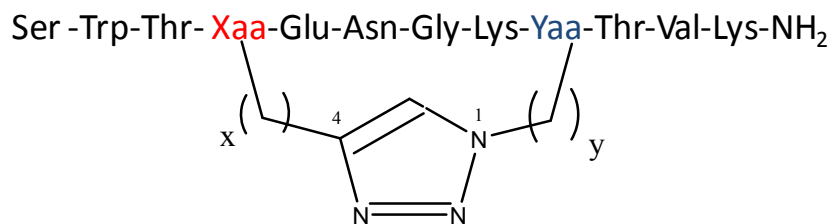

| N° | Name    | Xaa | Yaa     | x | y |
|----|---------|-----|---------|---|---|
| 1  | NHB 1.1 | Pra | Dap(N3) | 1 | 1 |
| 2  | NHB 1.2 | Pra | Dab(N3) | 1 | 2 |
| 3  | NHB 1.3 | Pra | Orn(N3) | 1 | 3 |
| 4  | NHB 1.4 | Pra | Lys(N3) | 1 | 4 |
| 5  | NHB 2.1 | Hpg | Dap(N3) | 2 | 1 |
| 6  | NHB 2.2 | Hpg | Dab(N3) | 2 | 2 |
| 7  | NHB 2.3 | Hpg | Orn(N3) | 2 | 3 |
| 8  | NHB 2.4 | Hpg | Lys(N3) | 2 | 4 |
| 9  | NHB 3.1 | Bpg | Dap(N3) | 3 | 1 |
| 10 | NHB 3.2 | Bpg | Dab(N3) | 3 | 2 |
| 11 | NHB 3.3 | Bpg | Orn(N3) | 3 | 3 |
| 12 | NHB 3.4 | Bpg | Lys(N3) | 3 | 4 |

**Figure S2:** General formulas for NHB peptidomimetic #1 - #12. Top: General sequence bearing different substitutions on positions 4 and 9. Xaa and Yaa are unnatural amino acids possessing respectively alkyno and azide group. The identity of the Xaa and Yaa amino acids and the nomenclature for the peptidomimetics are reported in the table.

| N° | Name           | Xaa     | Yaa     | x | y |
|----|----------------|---------|---------|---|---|
| 13 | NHB 1.2 rev    | Dap(N3) | Hpg     | 1 | 2 |
| 14 | NHB 2.1.rev    | Dab(N3) | Pra     | 2 | 1 |
| 15 | NHB 2.1 W3     | Hpg     | Dap(N3) | 2 | 1 |
| 16 | NHB 3.3_C      | Bpg     | Orn(N3) | 3 | 3 |
| 17 | NHB 3.3_N      | Bpg     | Orn(N3) | 3 | 3 |
| 18 | NHB 3.3_CN     | Bpg     | Orn(N3) | 3 | 3 |
| 19 | NHB 3.3 Δ turn | Bpg     | Orn(N3) | 3 | 3 |
| 20 | NHB 3.3 open   | Bpg     | Orn(N3) | 3 | 3 |

N°13 : NHB 1-2rev Ser -Trp-Thr- **Dap(N3)**-Glu-Asn-Gly-Lys-**Hpg**-Thr-Val-Lys-NH<sub>2</sub>

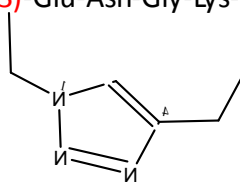

N°14 : NHB 2-1rev Ser -Trp-Thr- **Dab(N3)**-Glu-Asn-Gly-Lys-**Pra**-Thr-Val-Lys-NH<sub>2</sub>

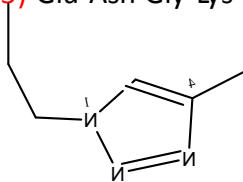

N°15 : NHB 2-1 W3 Ser -Thr-Trp- **Pra**-Glu-Asn-Gly-Lys-**Dab(N3)**-Thr-Val-Lys-NH<sub>2</sub>

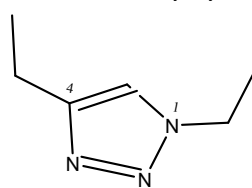

N°16 : NHB 3-3\_C Ser -Trp-Thr- **Bpg**-Glu-Asn-Gly-Lys-**Orn(N3)**-NH<sub>2</sub>

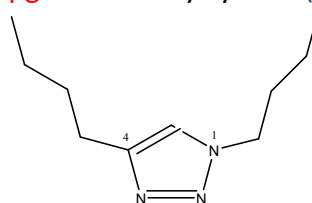

N°17 : NHB 3-3\_N Trp-**Bpg**-Glu-Asn-Gly-Lys-**Orn(N3)**-Thr-Val-Lys-NH<sub>2</sub>

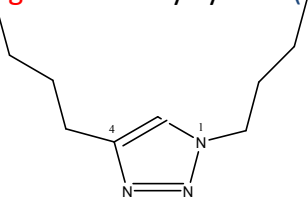

N°18 : NHB 3-3\_CN Trp- **Bpg**-Glu-Asn-Gly-Lys-**Orn(N3)**-NH<sub>2</sub>

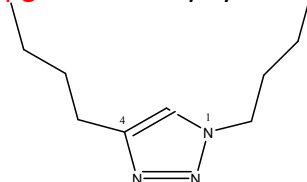

N°19 : NHB 3-3 Δ turn Ser -Trp-Thr- **Bpg-OH** H-**Orn(N3)**-Thr-Val-Lys-NH<sub>2</sub>

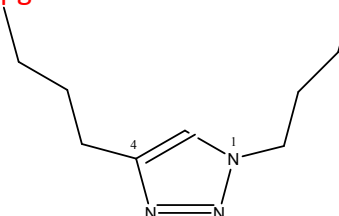

N°20 : NHB 3-3 open Ser-Trp-Thr-**Bpg**-Glu-Asn-Gly-Lys-COOH H<sub>2</sub>N-**Orn(N3)**-Thr-Val-Lys-NH<sub>2</sub>

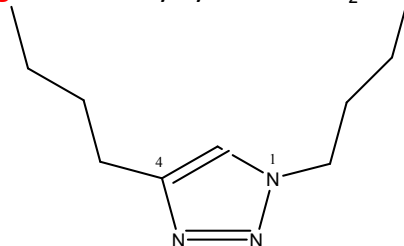

Figure S3: Molecular structures of NHB peptidomimetic #13 - #20. Top: The identity of the Xaa and Yaa amino acids and the nomenclature for the peptidomimetics are reported in the table. Bottom: Molecular structure of NHB peptidomimetics #13 - #20. Xaa and Yaa amino acids are highlighted in red and blue respectively.

**Table S1:** Analytical characterization of NHB linear and cyclized peptidomimetics.

| N° | Name                      | Rt precursors (min.) | Rt clicked compound (min.) | HPLC method <sup>a</sup> | M.W. Calc (amu) <sup>c</sup> | [M+H] <sup>+</sup> Exp. (amu) <sup>c</sup> |
|----|---------------------------|----------------------|----------------------------|--------------------------|------------------------------|--------------------------------------------|
| 1  | NHB 1.1                   | 13.84                | 13.42                      | A                        | 1354.4                       | 1355.7                                     |
| 2  | NHB 1.2                   | 14.22                | 13.06                      | A                        | 1368.5                       | 1369.7                                     |
| 3  | NHB 1.3                   | 19.18                | 15.93                      | A                        | 1382.5                       | 1383.7                                     |
| 4  | NHB 1.4                   | 14.69                | 13.5                       | A                        | 1396.5                       | 1397.5                                     |
| 5  | NHB 2.1                   | 14.9                 | 13.26                      | A                        | 1368.4                       | 1369.7                                     |
| 6  | NHB 2.2                   | 14.37                | 11.11                      | A                        | 1382.5                       | 1383.9                                     |
| 7  | NHB 2.3                   | 12.58                | 12.02                      | A                        | 1396.5                       | 1397.8                                     |
| 8  | NHB 2.4                   | 15.09                | 13.34                      | A                        | 1410.5                       | 1411.5                                     |
| 9  | NHB 3.1                   | 17.05                | 13.39                      | A                        | 1382.5                       | 1383.8                                     |
| 10 | NHB 3.2                   | 14.79                | 11.07                      | A                        | 1396.6                       | 1397.8                                     |
| 11 | NHB 3.3                   | 14.9                 | 13.22                      | A                        | 1410.6                       | 1411.7                                     |
| 12 | NHB 3.4                   | 15.51                | 13.55                      | A                        | 1424.4                       | 1425.4                                     |
| 13 | NHB 1.2 rev               | 12.69                | 5.5                        | B                        | 1368.5                       | 1368.7                                     |
| 14 | NHB 2.1.rev               | 14.18                | 13.9                       | A                        | 1368.4                       | 1369.7                                     |
| 15 | NHB 2.1 W3                | 14.12                | 12.04                      | A                        | 1368.4                       | 1369.7                                     |
| 16 | NHB 3.3_C                 | 17.69                | 15.01                      | C                        | 1082.2                       | 1083.3                                     |
| 17 | NHB 3.3_N                 | 16.87                | 14.45                      | C                        | 1222.4                       | 1223.6                                     |
| 18 | NHB 3.3_CN                | 17.09                | 14.07                      | C                        | 894.0                        | 895.4                                      |
| 19 | NHB 3.3 Δ turn            | ----                 | 14.5                       | D                        | 999.1                        | 1000.6                                     |
| 20 | NHB 3.3 open <sup>b</sup> | 14.9                 | 13.35                      | A                        | 1429.6                       | 1430.7                                     |

<sup>a</sup>All analytical RP-HPLC method consist of a linear gradients of CH<sub>3</sub>CN/TFA 0.1% (solvent A) in H<sub>2</sub>O/TFA 0.1% (solvent B). Method A: solvent A from 5% to 70% in 20 min; Method B: solvent A from 15% to 30% in 20 min; Method C: solvent A from 5% to 50% in 20 min; Method D: solvent A from 5% to 70% in 20 min.

<sup>b</sup>NHB 3.3 open was obtained by trypsin digestion of clicked NHB3.3. The Rt of the precursor is the same as NHB3.3.

<sup>c</sup>Calculated and experimental masses refer to the cyclic peptidomimetics.
